# Supplementary material for: Molecular and Cellular Adaptations in Hippocampal Parvalbumin Neurons Mediate Behavioral Responses to Chronic Social Stress
Source: PubMed Central journal article supplement (PMC9268684; doi:10.3389/fnmol.2022.898851), 2022-06-24
Supplement: Table_1.pdf [file Table_1.pdf]

**Supplementary Table 1** Summary of statistical analysis (related to all Figures).

| Figure | Experimental variables                                            | Statistical test | Results                                                                                                                     | Post hoc tests                                                                                                                                                                                                    |
|--------|-------------------------------------------------------------------|------------------|-----------------------------------------------------------------------------------------------------------------------------|-------------------------------------------------------------------------------------------------------------------------------------------------------------------------------------------------------------------|
| 1      | <b>B</b> group (Non-defeat, Res, Sus)                             | one-way ANOVA    | group: $F(2,58)=40.82$ , $p<0.0001$                                                                                         | Bonferroni's multiple comparisons test<br>ND vs. Res: $p=0.9763$<br>ND vs. Sus: $p<0.0001$<br>Res vs. Sus: $p<0.0001$                                                                                             |
|        | <b>F</b> group (Cont, Res, Sus, Sus+Ket)                          | one-way ANOVA    | group: $F(3, 138) = 6.454$ , $p = 0.0004$                                                                                   | Bonferroni's multiple comparisons test<br>ND vs. Sus: $p=0.0452$<br>ND vs. Res: $p>0.9999$<br>ND vs. Sus+Ket: $p>0.9999$<br>Sus vs. Res: $p=0.0131$<br>Sus vs. Sus+Ket: $p=0.0003$<br>Res vs. Sus+Ket: $p>0.9999$ |
|        | <b>G</b> group (Cont, Res, Sus, Sus+Ket)                          | one-way ANOVA    | group: $F(3, 202) = 5.632$ , $p = 0.001$                                                                                    | Bonferroni's multiple comparisons test<br>ND vs. Sus: $p=0.0076$<br>ND vs. Res: $p>0.9999$<br>ND vs. Sus+Ket: $p>0.9999$<br>Sus vs. Res: $p=0.0499$<br>Sus vs. Sus+Ket: $p=0.0008$<br>Res vs. Sus+Ket: $p>0.9999$ |
|        | <b>H</b> group (Cont, Res, Sus, Sus+Ket)                          | one-way ANOVA    | group: $F(3, 130) = 4.673$ , $p = 0.0039$                                                                                   | Bonferroni's multiple comparisons test<br>ND vs. Sus: $p>0.9999$<br>ND vs. Res: $p>0.9999$<br>ND vs. Sus+Ket: $p=0.0223$<br>Sus vs. Res: $p>0.9999$<br>Sus vs. Sus+Ket: $p=0.0064$<br>Res vs. Sus+Ket: $p=0.0131$ |
|        | <b>I</b> group (Cont, Res, Sus, Sus+Ket)                          | one-way ANOVA    | group: $F(3, 287) = 0.682$ , $p = 0.5599$                                                                                   | n/a                                                                                                                                                                                                               |
| 2      | <b>D</b> group (mCherry, hM4Di); treatment (non-defeat, defeated) | two-way ANOVA    | group: $F(1,45)=3.693$ , $p=0.0610$ ; treatment: $F(1,45)=0.04982$ , $p=0.8244$ ; interaction, $F(1,45)=10.23$ , $p=0.0025$ | Bonferroni's multiple comparisons test<br>mCherry vs. hM4Di:<br>No Defeat: $p=0.8300$<br>Defeat: $p=0.0004$                                                                                                       |
|        | <b>F</b> group (mCherry, hM4Di); treatment (non-defeat, defeated) | two-way ANOVA    | group: $F(1,48)=6.808$ , $p=0.0121$ ; treatment: $F(1,48)=3.207$ , $p=0.0796$ ; interaction: $F(1,48)=4.616$ , $p=0.0368$   | Bonferroni's multiple comparisons test<br>mCherry vs. hM4Di:<br>No Defeat: $p>0.9999$<br>Defeat: $p=0.0006$                                                                                                       |

|   |          |                                               |                                              |                                                                                                                                                                 |                                                                                                                                                                                                                                                                                                                                                            |
|---|----------|-----------------------------------------------|----------------------------------------------|-----------------------------------------------------------------------------------------------------------------------------------------------------------------|------------------------------------------------------------------------------------------------------------------------------------------------------------------------------------------------------------------------------------------------------------------------------------------------------------------------------------------------------------|
|   | <b>H</b> | time (Pre, CNO, Post); group (mCherry, hM4Di) | two-way repeated measures ANOVA              | time: $F(2,26) = 1.805$ , $p=0.1845$ ; group: $F(1,13)=2.834$ , $p=0.1161$ ; interaction: $F(2,26)=4.945$ , $p=0.0151$ ; subject: $F(13,26)=1.935$ , $p=0.0737$ | Bonferroni's multiple comparisons test<br>mCherry vs. hM4Di:<br>Pre: $p>0.9999$<br>CNO: $p=0.0052$<br>Post: $p>0.9999$<br><br>Bonferroni's multiple comparisons test<br>mCherry:<br>Pre vs CNO: $p>0.9999$<br>Pre vs Post: $p>0.9999$<br>CNO vs Post: $p>0.9999$<br>hM4Di:<br>Pre vs CNO: $p=0.0190$<br>Pre vs Post: $p>0.9999$<br>CNO vs Post: $p=0.0162$ |
|   | <b>I</b> | hM4Di vs. mCherry                             | Two-tailed unpaired student's <i>t</i> -test | $t(14)=3.174$ , $p=0.0068$                                                                                                                                      | n/a                                                                                                                                                                                                                                                                                                                                                        |
|   | <b>M</b> | time (SI-1, SI-2); group (mCherry, hM3Dq)     | two-way repeated measures ANOVA              | time: $F(1,25)=2.348$ , $p=0.1380$ ; group: $F(1,25)=0.6389$ , $p=0.4316$ ; interaction: $F(1,25)=2.756$ , $p=0.1094$ ; subject: $F(25,25)=3.687$ , $p=0.0009$  | Bonferroni's multiple comparisons test<br>SI-1 vs SI-2<br>mCherry: $p>0.9999$<br>h3MDq: $p = 0.0489$                                                                                                                                                                                                                                                       |
|   | <b>O</b> | hM3Dq vs. mCherry                             | two-tailed unpaired student's <i>t</i> -test | $t(25)=2.147$ , $p=0.0416$                                                                                                                                      | n/a                                                                                                                                                                                                                                                                                                                                                        |
| 4 | <b>C</b> | group (Non-defeat, Res, Sus)                  | one-way ANOVA                                | group: $F(2,59)=21.48$ , $p<0.0001$                                                                                                                             | Bonferroni's multiple comparisons test<br>ND vs. Res: $p = 0.0002$<br>ND vs. Sus: $p=0.0266$<br>Res vs. Sus: $p<0.0001$                                                                                                                                                                                                                                    |
|   | <b>D</b> | SI Ratio vs. Ahnak protein                    | Pearson's Correlation                        | $R^2=0.1471$ , $p=0.0008$                                                                                                                                       | n/a                                                                                                                                                                                                                                                                                                                                                        |
|   | <b>F</b> | group (Non-defeat, Res, Sus)                  | Per Cell: Kruskal-                           | Per Cell: Kruskal-Wallis statistic: 38.89, $p<0.0001$                                                                                                           | Dunn's multiple comparisons test<br>ND vs. Res: $p = 0.0010$<br>ND vs. Sus: $p=0.0092$                                                                                                                                                                                                                                                                     |

|    |          |                                                                                                                       |                                 |                                                                                                                                                                      |                                                                                                                                                                                       |
|----|----------|-----------------------------------------------------------------------------------------------------------------------|---------------------------------|----------------------------------------------------------------------------------------------------------------------------------------------------------------------|---------------------------------------------------------------------------------------------------------------------------------------------------------------------------------------|
|    |          |                                                                                                                       | Wallis test                     |                                                                                                                                                                      | Res vs. Sus: $p < 0.0001$                                                                                                                                                             |
|    | <b>G</b> | SI Ratio vs. normalized Ahnak puncta per cell                                                                         | Pearson's Correlation           | $R^2 = 0.4911, p = 0.0240$                                                                                                                                           | n/a                                                                                                                                                                                   |
| 5  | <b>C</b> | group (GFP, cKO <sup>VDG</sup> ); treatment (non-defeat, defeated)                                                    | two-way ANOVA                   | group: $F(1,64) = 20.48, p < 0.0001$ ; treatment: $F(1,64) = 3.190, p = 0.0788$ ; interaction, $F(1,64) = 5.543, p = 0.0216$                                         | Bonferroni's multiple comparisons test<br>GFP vs. cKO <sup>VDG</sup><br>ND: $p > 0.9999$<br>Defeated: $p = 0.0072$                                                                    |
|    | <b>E</b> | group (GFP, cKO <sup>VDG</sup> ); treatment (non-defeat, defeated)                                                    | two-way ANOVA                   | group: $F(1,27) = 7.450, p = 0.0110$ ; treatment: $F(1,27) = 3.377, p = 0.0771$ ; interaction, $F(1,27) = 2.126, p = 0.1564$                                         | Bonferroni's multiple comparisons test<br>GFP vs. cKO <sup>VDG</sup><br>ND: $p > 0.9999$<br>Defeated: $p = 0.0268$                                                                    |
|    | <b>H</b> | group (fl/fl, cKO <sup>PV</sup> ); treatment (non-defeat, defeated)                                                   | two-way ANOVA                   | group: $F(1,60) = 4.796, p = 0.0324$ ; treatment: $F(1,60) = 12.92, p = 0.0007$ ; interaction, $F(1,60) = 1.289, p = 0.2608$                                         | Bonferroni's multiple comparisons test<br>fl/fl vs. cKO <sup>PV</sup><br>ND: $p > 0.9999$<br>Defeated: $p = 0.0174$                                                                   |
|    | <b>J</b> | group (fl/fl, cKO <sup>PV</sup> ); treatment (non-defeat, defeated)                                                   | two-way ANOVA                   | group: $F(1,43) = 9.779, p = 0.0032$ ; treatment: $F(1,43) = 34.76, p < 0.0001$ ; interaction, $F(1,43) = 1.239, p = 0.2719$                                         | Bonferroni's multiple comparisons test<br>fl/fl vs. cKO <sup>PV</sup><br>ND: $p = 0.3109$<br>Defeated: $p = 0.0101$                                                                   |
| S1 |          | time (absence, presence of aggressor); group (non-defeat, Res, Sus)                                                   | two-way repeated measures ANOVA | time: $F(1,58) = 0.5697, p = 0.4534$ ; group: $F(2,58) = 11.10, p < 0.0001$ ; interaction: $F(2,58) = 42.24, p < 0.0001$ ; subject: $F(58,58) = 1.590, p = 0.0401$   | Bonferroni's multiple comparisons test<br>Empty vs. Aggressor<br>ND: $p < 0.0001$<br>Res: $p < 0.0001$<br>Sus: $p < 0.0001$                                                           |
| S2 | <b>A</b> | time (absence, presence of aggressor); group (non-defeat mCherry, non-defeat hM4Di, defeated mCherry, defeated hM4Di) | two-way repeated measures ANOVA | time: $F(1,45) = 9.803, p = 0.0031$ ; group: $F(3,45) = 0.9129, p = 0.4423$ ; interaction, $F(3,45) = 3.042, p = 0.0384$ ; subject: $F(45,45) = 1.274, p = 0.2101$ . | Bonferroni's multiple comparisons test<br>Empty vs. Aggressor<br>ND-mCherry: $p = 0.4405$<br>ND-hM4Di: $p = 0.8719$<br>Defeated-mCherry: $p > 0.9999$<br>Defeated-hM4Di: $p = 0.0019$ |
|    | <b>B</b> | time (SI-1, SI-2, SI-3); group (mCherry, hM4Di)                                                                       | two-way repeated measures ANOVA | time: $F(2,26) = 4.214, p = 0.0260$ ; group: $F(1,13) = 5.703, p = 0.0328$ ; interaction, $F(2,26) = 4.945, p = 0.0151$ ; subject: $F(31,31) = 4.620, p < 0.0001$    | Bonferroni's multiple comparisons test<br>mCherry vs. hM4Di<br>Pre: $p > 0.9999$<br>CNO: $p = 0.0034$<br>Post: $p = 0.2192$                                                           |

|          |                                                                                                                |                                              |                                                                                                                                                                    |                                                                                                      |                                                                                                                                                                                                                                    |
|----------|----------------------------------------------------------------------------------------------------------------|----------------------------------------------|--------------------------------------------------------------------------------------------------------------------------------------------------------------------|------------------------------------------------------------------------------------------------------|------------------------------------------------------------------------------------------------------------------------------------------------------------------------------------------------------------------------------------|
|          |                                                                                                                |                                              |                                                                                                                                                                    |                                                                                                      | Bonferroni's multiple comparisons test<br>mCherry-<br>Pre vs. CNO: $p=0.9689$<br>Pre vs. Post: $p=0.4947$<br>CNO vs. Post: $p=0.9465$<br>hM4Di-<br>Pre vs. CNO: $p=0.0042$<br>Pre vs. Post: $p=0.9993$<br>CNO vs. Post: $p=0.0113$ |
| <b>C</b> | group (mCherry, hM3Dq); treatment (non-defeat, defeated);                                                      | two-way ANOVA                                | group: $F(1,45)=0.0002492$ , $p=0.9875$ ; treatment: $F(1,45)=5.623$ , $p=0.0221$ ; interaction, $F(1,45)=0.0474$ , $p=0.8287$                                     | n/a                                                                                                  |                                                                                                                                                                                                                                    |
| <b>D</b> | time (aggressor, no agressor); group (non-defeat mCherry, non-defeat hM43q, defeated mCherry, defeated hM3Dq); | two-way repeated measures ANOVA              | time: $F(1,45)=1.465$ , $p=0.2324$ ; group: $F(3,45)=1.310$ , $p=0.2830$ ; interaction, $F(3,45)=1.752$ , $p=0.1700$ ; subject, $F(45,45)=1.445$ , $p=0.1105$      | n/a                                                                                                  |                                                                                                                                                                                                                                    |
| <b>E</b> | Time (SI-1, SI-2); group (mCherry, hM3Dq)                                                                      | two-way repeated measures ANOVA              | time: $F(1,25)=0.4731$ , $p=0.4979$ , group: $F(1,25)=0.8439$ , $p=0.3671$ ; interaction: $F(1,25)=4.408$ , $p=0.0460$ , subject: $F(25,25)=6.997$ , $p<0.0001$    | Bonferroni's multiple comparisons test<br>SI-1 vs SI-2<br>mCherry: $p=0.7054$<br>hM3Dq: $p = 0.0938$ |                                                                                                                                                                                                                                    |
| <b>F</b> | Time (SI-1, SI-2); group (mCherry, hM3Dq)                                                                      | two-way repeated measures ANOVA              | time: $F(1,16)=1.172$ , $p=0.2951$ ; group: $F(1,16)=3.803$ ; $p=0.0689$ ; interaction, $F(1,16) = 2.534$ , $p = 0.1310$ ; $F(16,16)=0.88997$ , $p=0.5824$         | n/a                                                                                                  |                                                                                                                                                                                                                                    |
| <b>G</b> | Time (SI-1, SI-2); group (mCherry, hM3Dq)                                                                      | two-way repeated measures ANOVA              | time: $F(1,16)=0.008782$ , $p=0.9265$ , group: $F(1,16)=1.111$ , $p=0.3074$ ; interaction: $F(1,16)=0.1347$ , $p=0.7184$ ; subject: $F(16,16)=0.9884$ , $p=0.5092$ | n/a                                                                                                  |                                                                                                                                                                                                                                    |
| <b>H</b> | hM3Dq vs. mCherry                                                                                              | two-tailed unpaired student's <i>t</i> -test | $t(15)=0.09129$ , $p=0.9285$                                                                                                                                       | n/a                                                                                                  |                                                                                                                                                                                                                                    |

|    |          |                                                                                                                                       |                                             |                                                                                                                                                                                                                  |                                                                                                                                                                                                                                               |
|----|----------|---------------------------------------------------------------------------------------------------------------------------------------|---------------------------------------------|------------------------------------------------------------------------------------------------------------------------------------------------------------------------------------------------------------------|-----------------------------------------------------------------------------------------------------------------------------------------------------------------------------------------------------------------------------------------------|
| S4 | <b>A</b> | Time in interaction zone w/ Agg. Ahnak protein                                                                                        | Pearson's Correlation                       | $R^2=0.2572, p<0.0001$                                                                                                                                                                                           | n/a                                                                                                                                                                                                                                           |
|    | <b>B</b> | Time in Agg Zone vs. normalized Ahnak puncta per cell                                                                                 | Pearson's Correlation                       | $R^2=0.4282 p=0.0401$                                                                                                                                                                                            | n/a                                                                                                                                                                                                                                           |
| S5 | <b>A</b> | time (aggressor, no aggressor); group (non-defeat GFP, non-defeat cKO-vDG, defeated GFP, defeated cKO-vDG);                           | two-way repeated measures ANOVA             | time: $F(1,64)=0.2057, p=0.1564$ ; group: $F(3,64)=9.806, p<0.0001$ ; interaction, $F(3,64)=11.19, p<0.0001$ ; subject, $F(64,64)=1.566, p=0.0375$                                                               | Bonferroni's multiple comparisons test<br>Empty vs. Aggressor<br>ND-GFP: $p=0.0167$<br>ND-cKO <sup>vDG</sup> : $p=0.0160$<br>Defeated GFP: $p=0.0005$<br>Defeated cKO <sup>vDG</sup> : $p=0.9245$                                             |
|    | <b>B</b> | time (aggressor, no aggressor); group (non-defeat fl/fl, non-defeat cKO <sup>PV</sup> , defeated fl/fl, defeated cKO <sup>PV</sup> ); | two-way repeated measures ANOVA             | time: $F(1,60)=0.8963, p=0.3476$ ; group: $F(3,60)=4.853, p=0.0043$ ; interaction, $F(3,60)=9.608, p<0.0001$ ; subject, $F(60,60)=1.291, p=0.1625$                                                               | Bonferroni's multiple comparisons test<br>Empty vs. Aggressor<br>ND-fl/fl: $p=0.6562$<br>ND-cKO <sup>PV</sup> : $p=0.1557$<br>Defeated-fl/fl: $p<0.0001$<br>Defeated-cKO <sup>PV</sup> : $p=0.5232$                                           |
| S6 | <b>C</b> | group (fl/fl, cKO <sup>PV</sup> ); injected current                                                                                   | two-way ANOVA                               | firing at increased injected current (time): $F(7, 122) = 97.53, P < 0.0001$ ;<br>firing at the same injected current (group): $F(1, 122) = 31.68, P < 0.0001$ ;<br>Interaction: $F(7, 122) = 1.791, P = 0.0949$ | Bonferroni's multiple comparison; fl/fl vs. cKO <sup>PV</sup> :<br>0 pA: $p>0.9999$<br>100 pA: $p>0.9999$<br>200 pA: $p>0.9999$<br>300 pA: $p=0.4075$<br>400 pA: $p>0.1245$<br>500 pA: $p=0.0277$<br>600 pA: $p=0.0367$<br>700 pA: $p=0.0095$ |
|    | <b>E</b> | group (fl/fl, cKO <sup>PV</sup> )                                                                                                     | unpaired two-tailed student's <i>t</i> test | $p = 0.6777, t(15)=0.4238$                                                                                                                                                                                       | n/a                                                                                                                                                                                                                                           |

|          |                                   |                                                          |                            |     |
|----------|-----------------------------------|----------------------------------------------------------|----------------------------|-----|
| <b>F</b> | group (fl/fl, cKO <sup>PV</sup> ) | unpaired<br>two-<br>tailed<br>student's<br><i>t</i> test | $p = 0.8552, t(15)=0.1856$ | n/a |
| <b>G</b> | group (fl/fl, cKO <sup>PV</sup> ) | unpaired<br>two-<br>tailed<br>student's<br><i>t</i> test | $p = 0.0085, t(15)=3.024$  | n/a |
| <b>H</b> | group (fl/fl, cKO <sup>PV</sup> ) | unpaired<br>two-<br>tailed<br>student's<br><i>t</i> test | $p = 0.6841, t(15)=0.4148$ | n/a |
